# Supplementary material for: Effects of Genetic Variation on Urinary Small Molecule Signatures of Mice after Exposure to Ionizing Radiation: A Study of p53 Deficiency
Source: PubMed Central journal article supplement (PMC7345090; doi:10.3390/metabo10060234), 2020-06-08
Supplement: metabolites-10-00234-s001.pdf [file metabolites-10-00234-s001.pdf]

Supplementary Table 1. False-discovery rate corrected p-values determined from Welch's t-test.

| Metabolite           | p-value      |              | p-value      |              | p-value |              |
|----------------------|--------------|--------------|--------------|--------------|---------|--------------|
|                      | WT           | WT           | WT           | WT           | KO      | KO           |
|                      | 4 h          | 24 h         | 4 h          | 24 h         | 4 h     | 24 h         |
|                      | 8 Gy         | 8 Gy         | 10 Gy        | 10 Gy        | 10 Gy   | 10 Gy        |
| Carnitine            | <b>0.015</b> | 0.404        | 0.076        | 0.645        | 0.528   | 0.295        |
| Kynurenic acid       | <b>0.004</b> | 0.274        | 0.152        | 0.384        | 0.387   | 0.687        |
| Hippuric acid        | 0.188        | 0.051        | 0.860        | <b>0.039</b> | 0.854   | 0.272        |
| Phenylacetylglycine  | <b>0.006</b> | 0.712        | 0.939        | <b>0.025</b> | 0.314   | 0.356        |
| Creatine             | <b>0.006</b> | <b>0.011</b> | 0.411        | <b>0.001</b> | 0.275   | 0.097        |
| 4-Pyridoxic acid     | <b>0.042</b> | 0.061        | 0.300        | <b>0.025</b> | 0.275   | 0.108        |
| MHPG-SO <sub>4</sub> | <b>0.003</b> | 0.205        | <b>0.005</b> | 0.572        | 0.223   | 0.224        |
| 1-Methylhistamine    | 0.952        | <b>0.046</b> | 0.571        | <b>0.002</b> | 0.532   | 0.267        |
| N-Methylnicotinamide | 0.920        | <b>0.016</b> | 0.959        | <b>0.005</b> | 0.818   | 0.128        |
| N1-Acetylspermidine  | 0.826        | <b>0.007</b> | 0.876        | <b>0.001</b> | 0.349   | <b>0.014</b> |

SUPPLEMENTARY FIGURE 1

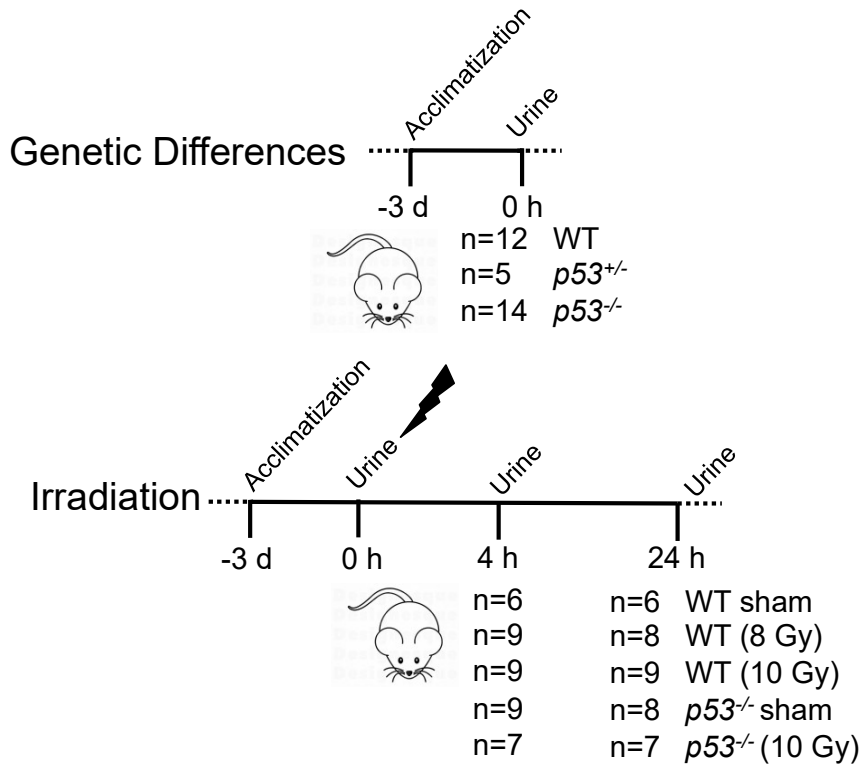

**Supplementary Figure 1.** Study design and sample size. The 4 and 24 h sham urine were combined for wild-type and  $p53^{-/-}$  for their respective control group.

SUPPLEMENTARY FIGURE 2

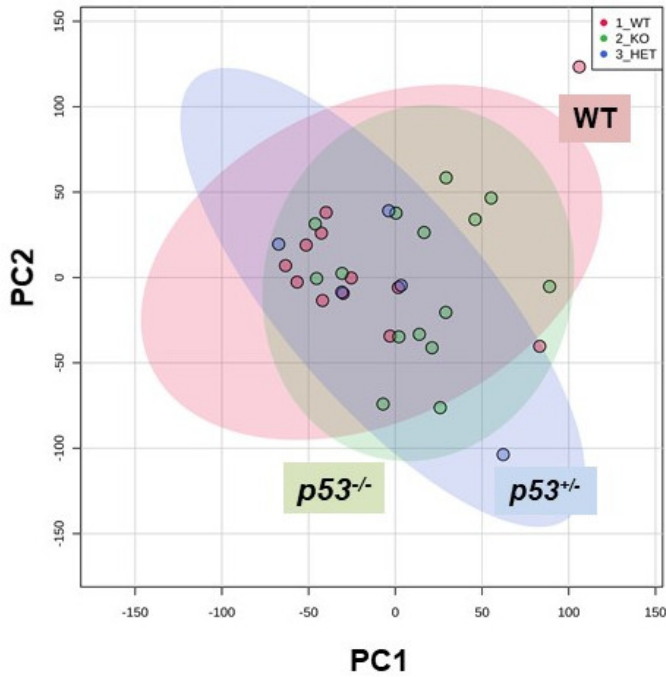

**Supplementary Figure 2.** Principal component analysis of unirradiated genotypes (WT,  $p53^{+/-}$ , and  $p53^{-/-}$  mice) showing high overlap, thus minimal differences, between groups.

### SUPPLEMENTARY FIGURE 3

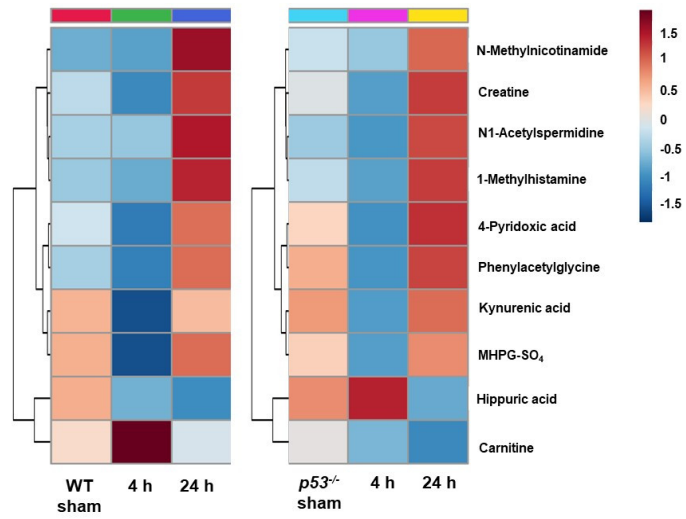

**Supplementary Figure 3.** Heatmap of urinary metabolites in wild-type (WT) mice (8 Gy) and *p53*<sup>-/-</sup> mice (10 Gy) at 4 and 24 h post-irradiation.

## SUPPLEMENTARY FIGURE 4

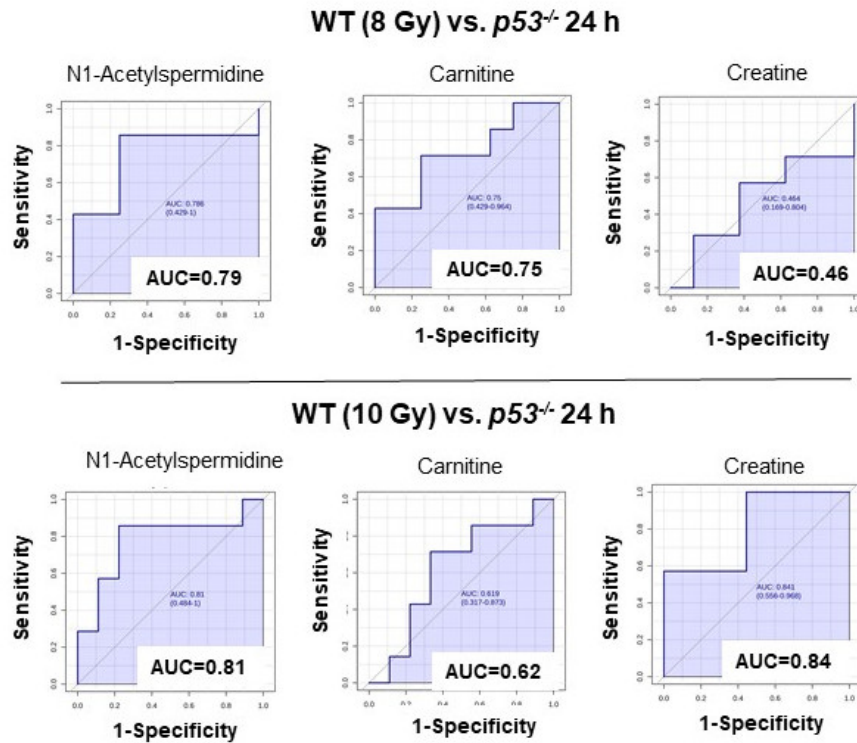

**Supplementary Figure 4.** Specificity and sensitivity of N1-acetylspermidine, carnitine, and creatine at 24 h post-irradiation determined by the area under the curve (AUC) values from receiver operating characteristic (ROC) analysis. The equidose (10 Gy) shows better classification performance than the equitoxic dose (8 Gy); however, poor specificity and sensitivity was observed (AUC<0.60) when metabolites were combined.
